# Supplementary material for: Elemental Composition and Cell Mass Quantification of Cultured Thraustochytrids Unveil Their Large Contribution to Marine Carbon Pool
Source: MDPI journal article supplement (doi:10.3390/md19090493), 2021-08-29
Supplement: s1 [file s1]

# Supplementary Information

## Elemental Composition and Cell Mass Quantification of Cultured Thraustochytrids Unveil their Large Contribution to Marine Carbon Pool

Biswarup Sen <sup>1</sup>, Jiaqian Li <sup>1</sup>, Lyu Lu <sup>1</sup>, Mohan Bai <sup>1</sup>, Yaodong He <sup>1</sup> and Guangyi Wang <sup>1,2,3,\*</sup>

<sup>1</sup> Center for Marine Environmental Ecology, School of Environmental Science and Engineering, Tianjin University, Tianjin 300072, China; bsen@tju.edu.cn (B.S.); lijiaqian@tju.edu.cn (J.L.); lvluu@tju.edu.cn (L.L.); bmh@zju.edu.cn (M.B.); yaodong.he@tju.edu.cn (Y.H.); gywang@tju.edu.cn (G.W.)

<sup>2</sup> Key Laboratory of Systems Bioengineering (Ministry of Education), Tianjin University, Tianjin 300072, China

<sup>3</sup> Qingdao Institute Ocean Engineering, Tianjin University, Qingdao 266237, China

\* Correspondence: gywang@tju.edu.cn; Tel: (86) 022-8740210

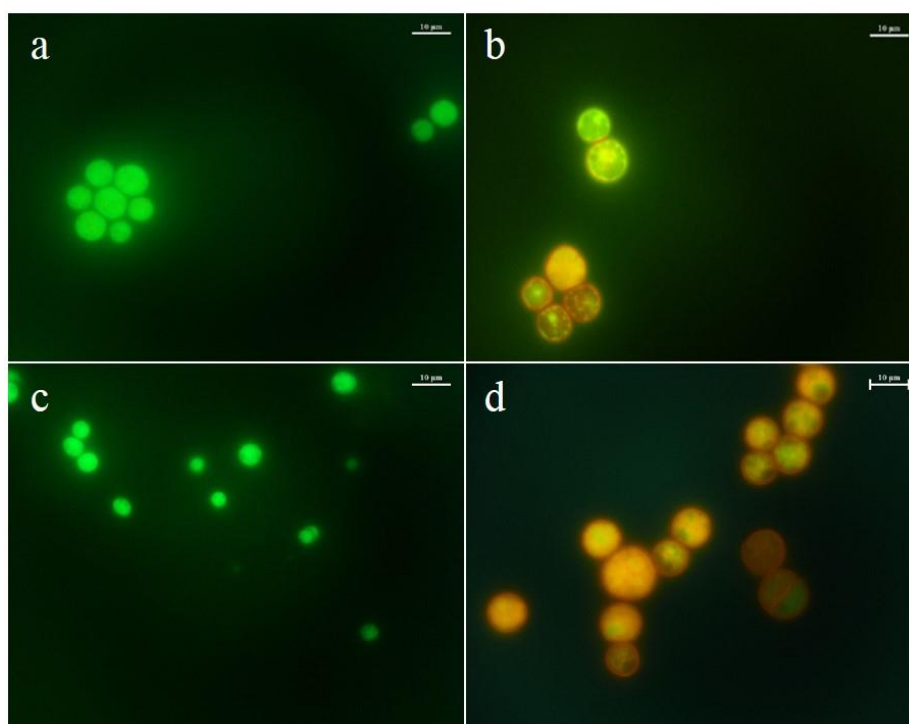

**Figure S1:** Micrographs of acriflavine-stained thraustochytrid cells. (a) PKU#Mn4 cells at 24 h, (b) PKU#Mn4 cells at 96 h, (c) PKU#Mn16 cells at 24 h, and (d) PKU#Mn16 cells at 96 h.

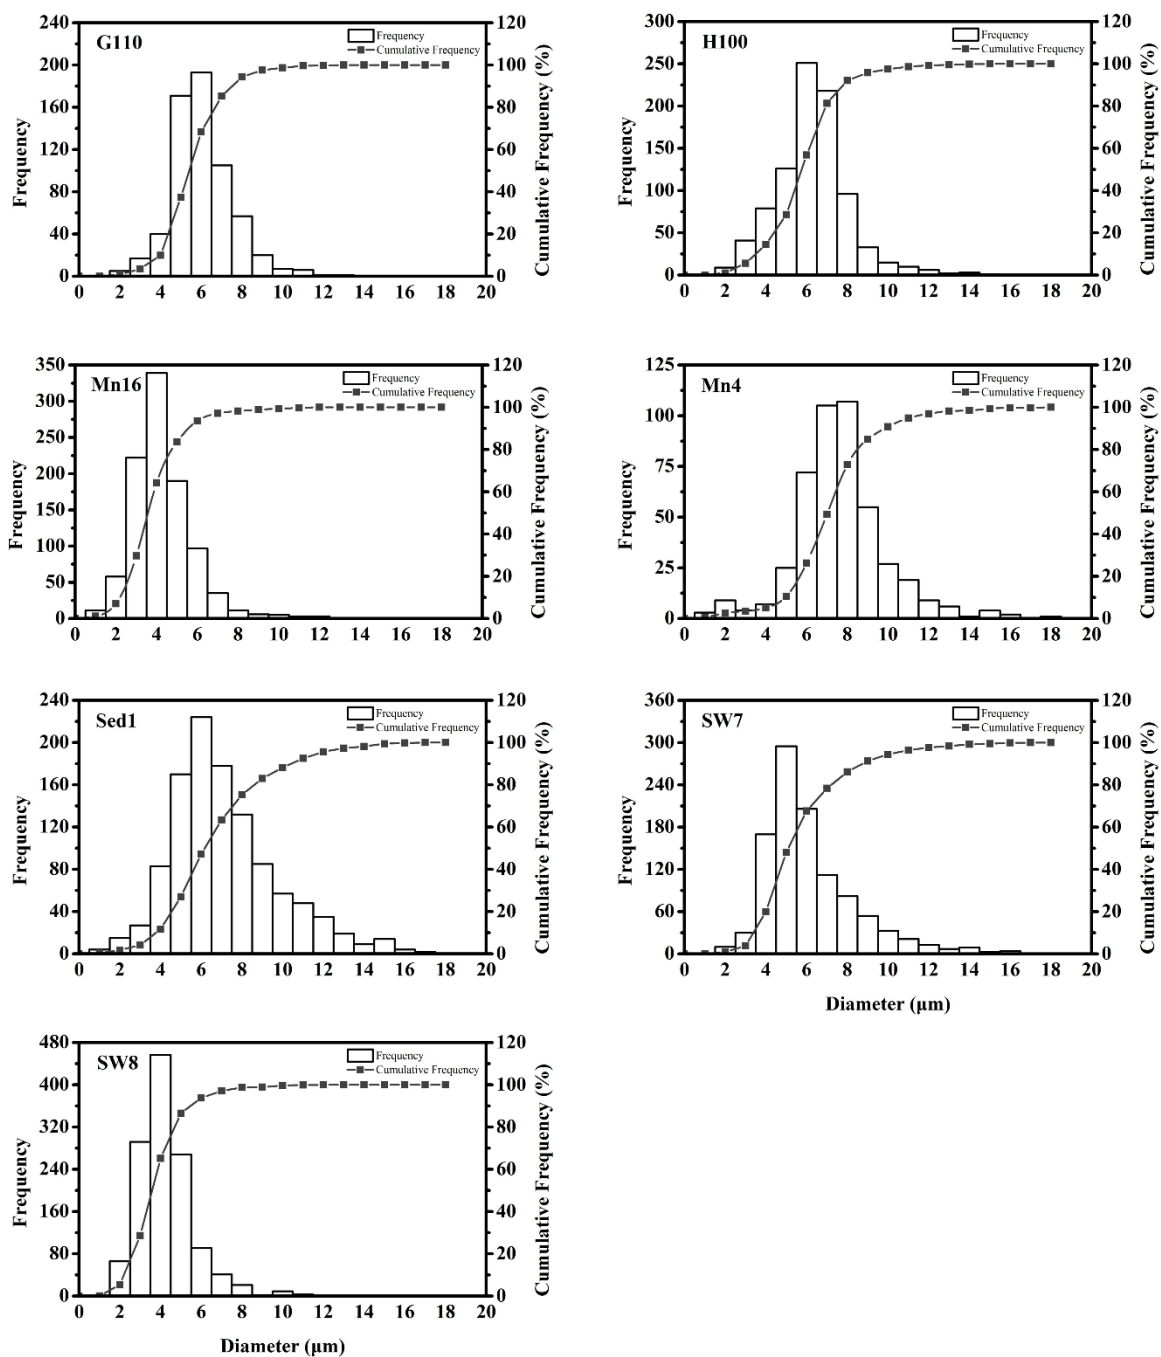

**Figure S2:** Cell size distribution of thraustochytrid isolates in exponential phase of growth.

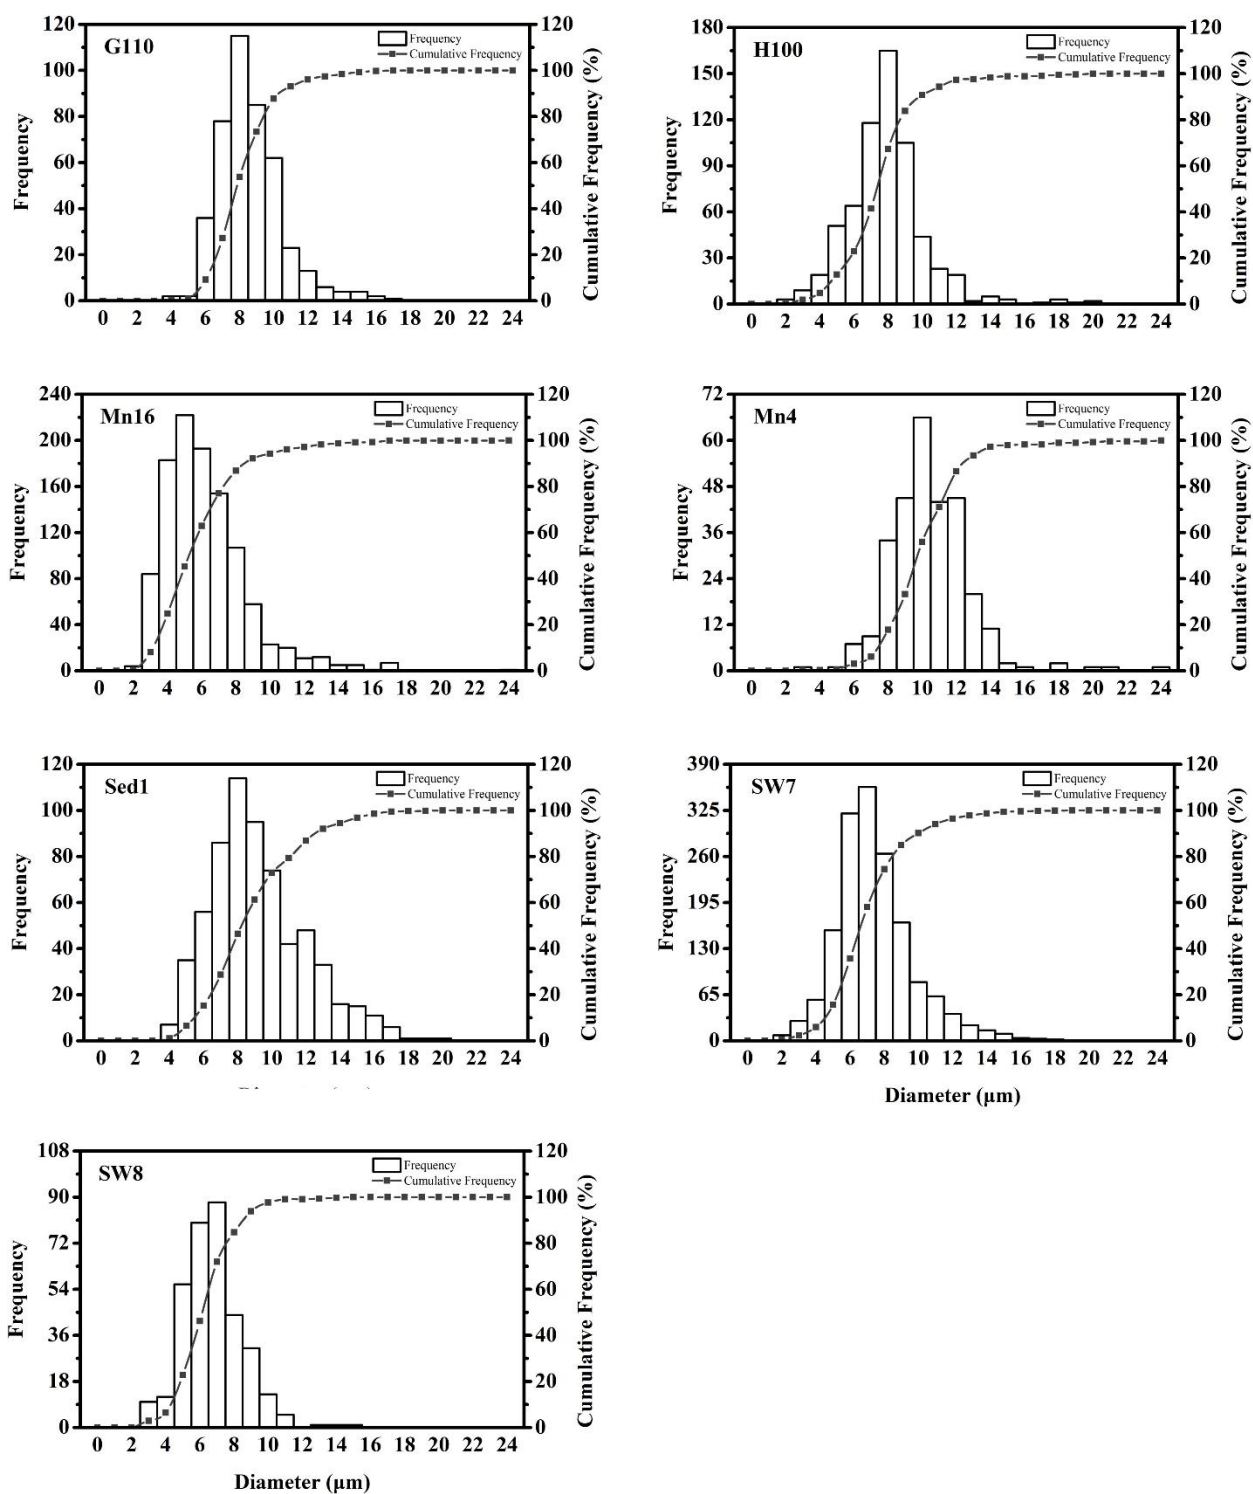

**Figure S3:** Cell size distribution of thraustochytrid isolates in stationary phase of growth.

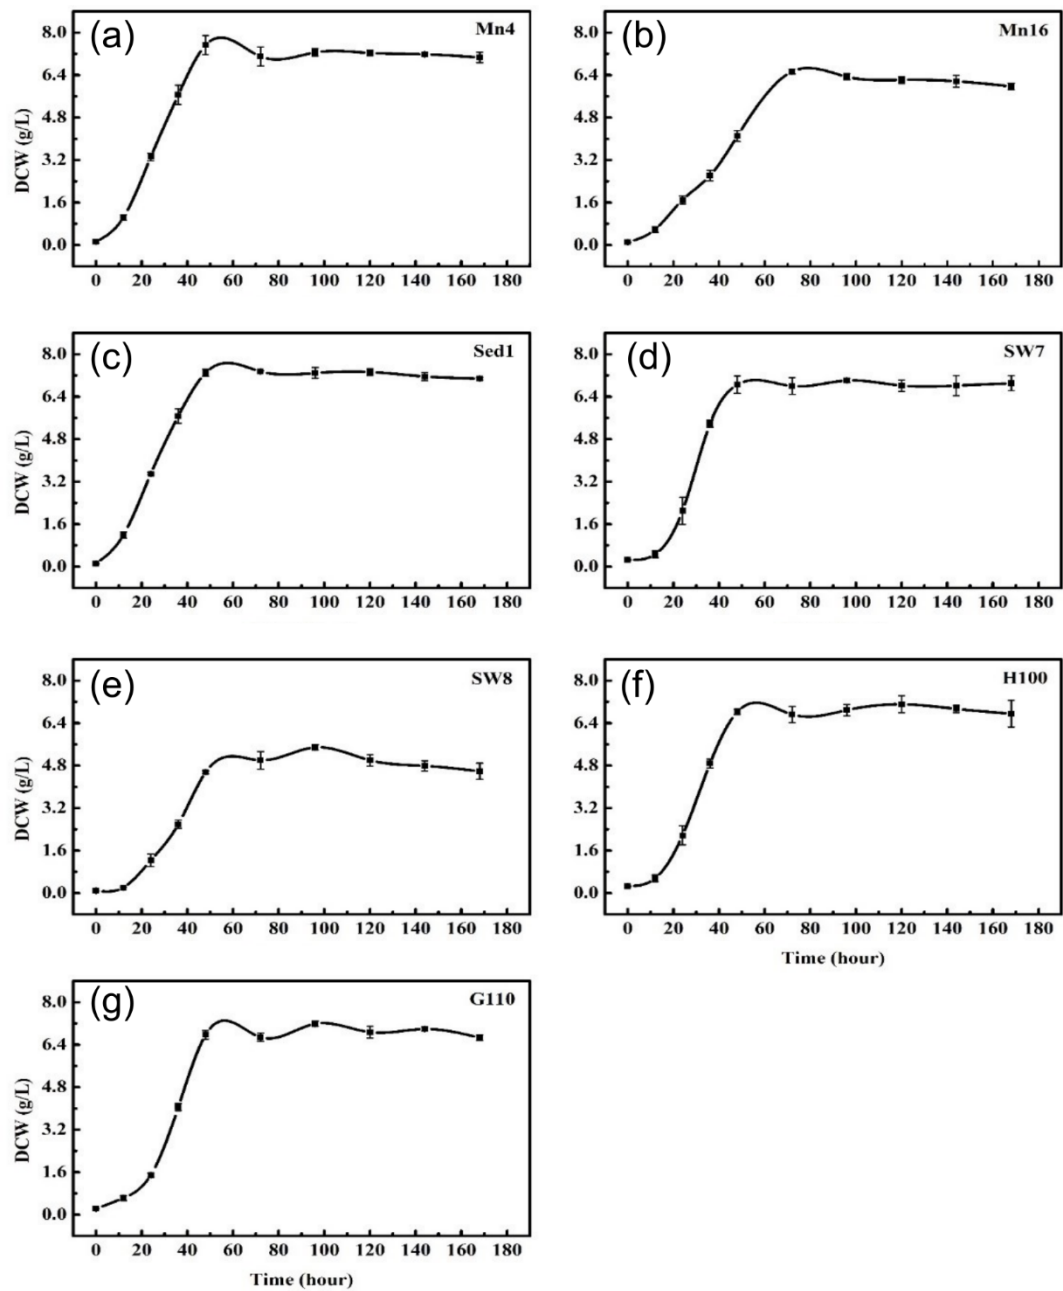

**Figure S4:** Growth curves of thraustochytrid isolates used in this study.
